1 **Article category:** *New Results*

2 **Title: Simultaneous therapeutic targeting of inflammation and virus ameliorates**  
3 **influenza pneumonia and protects from morbidity and mortality**

4 Pratikshya Pandey<sup>a,1</sup>, Zahrah Al Rumaih<sup>b,1</sup>, Ma. Junaliah Tuazon Kels<sup>b,1</sup>, Esther Ng<sup>b</sup>, Rajendra KC<sup>a</sup>, Roslyn  
5 Malley<sup>c</sup>, Geeta Chaudhri<sup>b,2</sup> and Gunasegaran Karupiah<sup>a,b,2,3</sup>.

6 <sup>a</sup>Viral Immunology and Immunopathology Group, Tasmanian School of Medicine, University of Tasmania,  
7 Hobart, TAS 7000, Australia

8 <sup>b</sup>Infection and Immunity Group, Department of Immunology, The John Curtin School of Medical Research,  
9 Australian National University, Canberra, ACT 2601, Australia

10 <sup>c</sup>Tasmanian School of Medicine, University of Tasmania, Hobart, TAS 7000, Australia

11 <sup>1</sup>Authors contributed equally

12 <sup>2</sup>Equal senior authors

13 <sup>3</sup>Correspondence: Gunasegaran Karupiah, Viral Immunology and Immunopathology Group, Tasmanian  
14 School of Medicine, University of Tasmania, Hobart, TAS 7000, Australia. Telephone: +61 3 6226 2658; E-  
15 mail: [Guna.Karupiah@utas.edu.au](mailto:Guna.Karupiah@utas.edu.au)

16 **Author Contributions:** Conceptualization, Z.A.R., M.J.T.K., P.P., E.N., G.C. and G.K.; Methodology,  
17 Z.A.R., M.J.T.K., P.P., E.N., G.C. and G.K.; Investigation, Z.A.R., M.J.T.K., P.P., E.N., R.K., R.M.; Writing –  
18 Original Draft, P.P., GC and G.K.; Writing – Review & Editing, P.P., M.J.T.K., Z.A.R., R.K., R.M., G.C. and  
19 G.K., Funding Acquisition, G.C. and G.K.; Resources, G.C. and G.K.; Supervision, G.C. and G.K.

20 **Competing Interest Statement:** We declare that we have no competing interests.

21 **Abstract**

22 Pneumonia is a severe complication caused by inflammation of the lungs following infection with seasonal  
23 and pandemic strains of influenza A virus (IAV) that can result in lung pathology, respiratory failure and  
24 death. There is currently no treatment available for severe disease and pneumonia caused by IAV. Antivirals  
25 are available, but they are far from satisfactory if treatment is not initiated within 48 hours of symptoms  
26 onset. Influenza complications and mortality are often associated with high viral load and excessive lung  
27 inflammatory cytokine response. Therefore, we simultaneously targeted IAV with the antiviral drug  
28 oseltamivir and inflammation with the anti-inflammatory drug etanercept, targeting TNF after the onset of  
29 clinical signs to treat IAV pneumonia effectively. The combined treatment effectively reduced lung viral load,  
30 lung pathology, morbidity and mortality during respiratory IAV infection in mice, contemporaneous with  
31 significant downregulation of the inflammatory cytokines TNF, IL-1 $\beta$ , IL-6, IL-12p40, chemokines CCL2,  
32 CCL5 and CXCL10 and dampened STAT3 activation. Consequently, combined therapy with oseltamivir and  
33 a STAT3 inhibitor also effectively reduced clinical disease and lung pathology. Combined treatment using  
34 either of the anti-inflammatory drugs and oseltamivir dampened an overlapping set of cytokines. Thus,  
35 combined therapy targeting a specific cytokine or cytokine signaling pathway plus an antiviral drug provides  
36 an effective treatment strategy for ameliorating IAV pneumonia. Effective treatment of IAV pneumonia  
37 required multiple doses of etanercept and a high dose of oseltamivir. This approach might apply to the  
38 treatment of pneumonia caused by severe acute respiratory syndrome coronavirus 2 (SARS-CoV-2).

## 39 **Significance Statement**

40 Antivirals against influenza A virus (IAV) are ineffective in treating pneumonia if administered 48 h after  
41 onset of disease symptoms. The host inflammatory response and tissue damage caused by IAV are  
42 responsible for lung pathology. We reasoned that targeting both virus and inflammation would be more  
43 effective in reducing lung pathology and pneumonia, morbidity and mortality. The simultaneous treatment  
44 with an anti-inflammatory drug targeting TNF or STAT3, combined with the anti-IAV antiviral drug,  
45 oseltamivir, significantly improved clinical disease, reduced lung viral load and pathology, and protected  
46 mice from severe pneumonia. The combined treatment suppressed multiple pro-inflammatory cytokines and  
47 cytokine signaling pathways. Thus, after the onset of disease symptoms, both virus and inflammation must  
48 be targeted to treat IAV pneumonia effectively.

## 49 **Introduction**

50 Pneumonia is a serious complication caused by inflammation of the lungs following infection with seasonal  
51 and pandemic influenza viruses that can result in lung pathology, respiratory failure and death (1-4). There  
52 are currently no treatments for influenza pneumonia and antivirals against influenza A viruses (IAVs) are far  
53 from satisfactory if treatment is not initiated within 48 h of onset of disease symptoms (5). Most individuals  
54 do not seek medical attention within this timeframe (6). There is thus an urgent need to advance therapies  
55 that specifically treat severe IAV post-onset of symptoms.

56 An over-exuberant immune response associated with dysregulated inflammatory cytokine/chemokine  
57 production, known as a 'cytokine storm' (7), causes pneumonia, lung pathology and death (4). Late after  
58 onset of symptoms (>48 h), the damaging effects of inflammatory cytokines and virus-mediated cytopathic  
59 effects plus tissue necrosis together contribute to lung pathology, morbidity and mortality (8). Excessive  
60 early inflammatory cytokine/chemokine responses and leukocyte recruitment can be predictive of poor  
61 prognosis and poor clinical outcomes in IAV infections (1, 9, 10) and those inflammatory factors directly  
62 contribute to leukocyte recruitment into the lungs (8, 11, 12). We reasoned that the simultaneous targeting  
63 of both virus and inflammation would be an effective treatment strategy to ameliorate influenza pneumonia  
64 (13). Targeting inflammatory cytokines or cytokine-signaling molecules will reduce inflammation and  
65 diminish leukocyte infiltration into the lung.

66 Of the various cytokines implicated, tumor necrosis factor (TNF) is a crucial driver of inflammation in IAV-  
67 induced pneumonia (14-17). Viral infection triggers rapid TNF production by the innate immune system  
68 through activation of the nuclear factor-kappa B (NF- $\kappa$ B) signaling pathway (18). TNF exists in two distinct  
69 forms: soluble TNF (sTNF) and its precursor, transmembrane TNF (mTNF). Both forms of TNF can bind to  
70 their cognate receptors, TNF receptors type I and II (TNFRI and TNFRII) and mediate biological effects on  
71 various cell types, mainly through the activation of the NF- $\kappa$ B pathway (13, 19). Both TNFR also exist as  
72 soluble (sTNFR) and membrane-bound (mTNFR) forms. The binding of sTNFRII or mTNFRII to mTNF can  
73 also transmit signals into mTNF-bearing cells and dampen inflammation through a process known as  
74 'reverse signaling' (20, 21).

75 Oseltamivir (22), an IAV neuraminidase (NA) inhibitor (NAI), is the most common anti-IAV drug currently  
76 used to treat individuals in high-risk groups (23). It is only effective if treatment is initiated within 48h of onset  
77 of disease symptoms (5, 24). Several clinical trials and meta-analyses have shown that oseltamivir is not  
78 very effective in reducing severe disease phenotypes, including hospitalization and pneumonia when  
79 treatment is commenced >48 h after the onset of symptoms (5).

80 We used a murine model of acute respiratory H1N1 IAV infection to investigate why oseltamivir is ineffective  
81 in reducing morbidity and mortality if treatment is initiated late after the onset of disease signs. We have  
82 found that oseltamivir can effectively reduce disease severity and mortality in IAV-infected mice even after  
83 the onset of disease signs only when inflammation is simultaneously also targeted. We used the anti-TNF  
84 drug etanercept, widely used to treat several inflammatory diseases (25). Etanercept alone reduced disease  
85 signs and lung pathology but did not protect mice from mortality. Similarly, treatment with only oseltamivir  
86 was effective in reducing viral load but animals died from severe lung pathology.

87 Dysregulated TNF production results in the dysregulation of an overlapping set of cytokines, chemokines  
88 and cytokine-signaling pathways, including the NF- $\kappa$ B and signal transducer and activator of transcription  
89 (STAT) 3 pathways (26, 27). We used an inhibitor of STAT3, S3I-201, as an alternative anti-inflammatory  
90 drug to reduce lung inflammation. Combined treatment with S3I-201 and oseltamivir reduced viral load,  
91 clinical illness, lung inflammation and pathology in IAV-infected mice. Notably, the combined treatment with  
92 oseltamivir and etanercept or S3I-201 dampened the expression levels of an overlapping set of inflammatory  
93 cytokines, chemokines, and phosphorylated STAT3 (pSTAT3) protein. Many of these factors have been  
94 implicated causing lung pathology during IAV infection.

95 Our findings not only help explain why NAIs are ineffective in treating severe disease and pneumonia  
96 caused by IAV infection if administered late after the onset of disease symptoms but also provide effective  
97 treatment strategies. Although excessive levels of several cytokines and chemokines have been implicated  
98 in the pathogenesis of influenza pneumonia and lung pathology, our results indicate that the targeting of  
99 just one inflammatory cytokine or a cytokine signaling pathway is sufficient to ameliorate lung pathology and  
100 protect mice from an otherwise lethal disease when treatment is combined with oseltamivir.

## 101 **Results**

### 102 **Late after Disease Onset, High Viral Load Drives Inflammatory Cytokine Response Contributing to** 103 **Disease Severity and Mortality in IAV-infected Mice**

104 Excessive early cytokine responses can be predictive of poor prognosis and poor clinical outcomes (1, 9,  
105 10). We hypothesized that the escalating viral load, late after disease onset, will potentially drive a higher  
106 inflammatory response. We wanted to first establish whether a high viral load, increased levels of  
107 inflammatory cytokines/chemokines or both contributed to morbidity and mortality of IAV infected mice.

108 Groups of C57BL/6 mice (n=5) were left uninfected (control) or infected with 1000, 2000 or 3000 PFU  
109 through the intranasal (i.n.) route and killed for ethical reasons when they had lost significant weight or were  
110 morbid, and the remaining animals were killed on day 12 post-infection (p.i.).

111 Disease severity, determined by the extent of weight loss and clinical scores (condition of hair coat, posture,  
112 breathing, lacrimation and nasal discharge, and activity and behavior as described elsewhere (26, 27) were  
113 generally significantly higher in mice infected with higher doses of IAV (Supplementary Fig. S1 A and B).  
114 Expectedly, viral load was higher in the lungs of mice infected with higher doses of IAV (Supplementary Fig.  
115 S1C). Regardless of the dose of virus inoculated, lung IAV load positively correlated with weight loss and  
116 clinical scores (Pearson's coefficient  $r > 0.8$ ) (Table 1). The survival rates were 60%, 20% and 40% for mice  
117 infected with 1000, 2000 and 3000 PFU, respectively (Supplementary Fig. S1D). A total of 9 animals from  
118 the 1000 (n=2), 2000 (n=4) and 3000 (n=3) PFU infection groups that were severely morbid and succumbed  
119 early to infection (days 6-10 p.i.), had high lung viral load ( $>10^4$  PFU/g lung tissue), regardless of the dose  
120 of virus inoculation (Supplementary Fig. S1E). Except for two infected mice from the 3000 PFU infection  
121 group, all remaining animals killed on day 12 p.i. had a low lung viral load. Thus, high lung viral load was  
122 associated with increased disease severity and mortality in IAV-infected mice (Supplementary Fig. S1E).

123 The levels of mRNA transcripts for TNF, IL-6, IL-12p40, CCL2, CCL5, and CXCL10 positively correlated  
124 (Pearson's coefficient  $r > 0.5$ ) (Table 1) with weight loss and clinical scores (Supplementary Fig. S1 F-K).  
125 In particular, increasing the virus inoculum dose increased IL-6, CCL2, CCL5, and CXCL10 mRNA levels,  
126 and animals with high levels of cytokines/chemokines were more likely to become moribund and die

127 compared (Supplementary Fig. S1 L-Q). All 9 mice that succumbed to infection expressed high levels of  
128 cytokines and chemokines. Importantly, two infected mice that survived despite having high viral titers had  
129 lower cytokine/chemokine levels than those which succumbed. Thus, high viral load in parallel with high  
130 cytokine/chemokine transcript levels is associated with increased morbidity and mortality of IAV infected  
131 mice.

### 132 **Etanercept Treatment of WT Mice Improves Clinical Disease and Reduces Lung Immunopathology** 133 **without Affecting IAV Load but TNF Deficiency Exacerbates Lung Pathology**

134 Etanercept mediates anti-inflammatory effects by neutralizing sTNF and triggering reverse signaling via  
135 mTNF (28, 29). We first used WT mice and a triple mutant (TM) strain, which expresses only the non-  
136 cleavable mTNF but not sTNF, TNFRI and TNFRII, to establish that etanercept can reduce lung  
137 inflammation during an IAV infection. TM mice lack endogenous TNF signaling like TNF<sup>-/-</sup> mice but respond  
138 to exogenous TNFR such as etanercept. WT and TM mice infected with 3000 PFU IAV i.n. were treated  
139 with 2.5 mg/kg etanercept or vehicle (PBS) intraperitoneally (i.p.) on days 1, 3 and 4 p.i. Animals were killed  
140 on day 5 p.i.

141 Compared with WT mice, mock-treated TM mice developed more severe disease as evident by higher  
142 losses in body weights and increased clinical scores and lung histopathological scores, evaluate pulmonary  
143 inflammatory cell infiltrate, oedema and bronchial epithelial cell loss as markers of inflammation and lung  
144 damage (Fig. 1 A-E). We generated lung histopathological scores from the microscopic examination of  
145 hematoxylin and eosin (H&E)-stained lung sections described elsewhere (26, 27). Treatment with  
146 etanercept significantly reduced weight loss, clinical scores and histopathological scores in both strains of  
147 mice (Fig. 1 A-E) but did not affect viral load (Fig. 1F). Microscopic examination of lung histological sections  
148 revealed dramatic reductions in parenchymal edema and inflammatory cell infiltration by etanercept  
149 treatment, consistent with reduced weight loss, clinical scores and histopathological scores (Fig. 1G).

150 We tested the response of TNF<sup>-/-</sup> mice to IAV infection as we wanted to use them as controls in experiments  
151 with etanercept and oseltamivir combined treatment. We found that IAV-infected TNF<sup>-/-</sup> mice had  
152 significantly higher clinical scores than WT mice, evident from days 4-6 p.i. although both strains had

153 comparable body weight losses from days 2-6 p.i. (Supplementary Fig. S2 A and B). The lung viral load was  
154 high ( $>10^6$  PFU) and comparable in both strains of mice (Supplementary, Fig. S2C).  $TNF^{-/-}$  mice had  
155 significantly higher histopathological scores (Supplementary Fig. S2D) due to the more pronounced lung  
156 pathological changes compared to WT mice (Supplementary Fig. S2 E-P), consistent with a previous report  
157 (30).

### 158 **One Dose of Etanercept Combined with a Standard Dose of Oseltamivir (40 mg/kg) Daily Treatment** 159 **Reduces Morbidity and Lung Pathology but has no Effect on Viral Load**

160 Etanercept treatment beginning at day 1 p.i. with IAV improved clinical disease and lung pathology (Fig. 1).  
161 However, most patients seek medical attention late after the onset of symptoms (6). Furthermore, the  
162 cytopathic effects of exponentially increasing viral load also contribute to lung injury at that stage of the  
163 disease, but etanercept does not affect lung viral load. We reasoned that combined treatment with  
164 etanercept and oseltamivir simultaneously would be necessary to minimize disease severity effectively.

165 An oral dose of 150 mg oseltamivir twice daily is well-tolerated in adult humans (31) and is equivalent to a  
166 dose of 20 mg/kg in mice administered twice daily (32). Mice infected with 3000 PFU IAV i.n. were given an  
167 oral dose of oseltamivir at 20 mg/kg (twice daily; total 40 mg/kg/day), one dose of etanercept, or both drugs  
168 (combined) on day 3 p.i. after onset of disease signs. Additional doses of oseltamivir were given on days 4  
169 and 5 p.i. All mice were killed on day 6 p.i. Since the clinical course of IAV disease is short in mice, it leaves  
170 a very narrow window period for treatment. We commenced treatment from day 3 p.i, so that animals receive  
171 appropriate treatment(s) for at least 2 days before they succumb to infection.

172  
173 Oseltamivir or combined treatment significantly reduced weight loss, clinical scores and lung  
174 histopathological scores (Supplementary Fig. S3 A-C) but did not affect viral load in the lung (Supplementary  
175 Fig. S3D). A single dose of etanercept also significantly reduced clinical scores but had no impact on weight  
176 loss or histopathological scores (Supplementary Fig. S3 E-I).



177 Oseltamivir or etanercept significantly reduced the levels of mRNA transcripts for TNF, IL-6, IL-12p40,  
178 CCL2, and CCL5 (Supplementary Fig. S4 A and C-F). In addition to these cytokines/chemokines, the  
179 combined treatment significantly downregulated levels of expression of IL-1 $\beta$  and CXCL10 (Supplementary  
180 Fig. S4 B and G). mTNF levels were significantly reduced by all three treatment regimens (Supplementary  
181 Fig. S4H). IAV infection minimally activated NF- $\kappa$ B p65, but levels were significantly reduced by oseltamivir  
182 or combined treatment (Supplementary Fig. S4I). On the other hand, STAT3, another critical transcription  
183 factor implicated in the host inflammatory response, was highly activated by IAV infection. All three treatment  
184 regimens reduced IAV-induced pSTAT3 levels, however, the reduction was modest with etanercept or  
185 combined treatments but was significant with oseltamivir treatment alone (Supplementary Fig. S4J). In terms  
186 of lung levels of pSTAT3, we observed high variability between animals in each of the three treatment  
187 groups.

#### 188 **Combined Daily Treatment with Etanercept and High Dose Oseltamivir Reduces Morbidity, Lung** 189 **Viral Load and Pathology in IAV-infected Mice**

190 A single dose of etanercept and 20 mg/kg oseltamivir (administered twice daily) were ineffective in reducing  
191 weight loss, viral load and histopathological scores. Chronic inflammatory diseases like rheumatoid arthritis  
192 are treated with etanercept once or twice a week (25). However, levels of TNF produced during an acute  
193 viral infection is likely to be different to those during a chronic inflammatory condition. Therefore, we have  
194 administered etanercept and 150 mg/kg oseltamivir once daily in subsequent experiments, unless indicated  
195 otherwise.

196 Groups of IAV-infected WT, TM and TNF<sup>-/-</sup> mice were treated with oseltamivir, etanercept or both drugs after  
197 onset of disease signs on day 3 p.i., treatment continued on days 4 and 5 p.i. once daily and animals killed  
198 at day 6 p.i. TNF<sup>-/-</sup> mice were used as negative controls as they do not respond to etanercept treatment (33)  
199 (33). TM mice lack endogenous TNF signaling but respond to etanercept treatment (Fig. 1).

200 Mock-, etanercept- or oseltamivir-treated WT mice continued to lose weight until day 6 p.i. when animals  
201 were killed for various analyses. In contrast, WT mice given the combined treatment stopped losing weight  
202 just one day after initiation of treatment and by day 6 p.i., body weight loss in this group was significantly

203 lower than the other groups (Fig. 2A). All treatment regimens significantly lowered clinical scores from day  
204 4 p.i., but the most significant reduction was in the combined treatment group (Fig. 2B). Lung viral load was  
205 similar in mock, and etanercept treated groups but significantly reduced by oseltamivir or combined  
206 treatment compared with the mock-treated group (Fig. 2C). Notably, once-daily treatment with 150 mg/kg  
207 oseltamivir alone effectively reduced viral load late after the onset of disease signs. There were significant  
208 reductions in lung histopathological scores in etanercept- but not oseltamivir-treated animals compared to  
209 mock-treated mice, but the combined treatment showed the most considerable reduction (Fig. 2D).

210 In IAV-infected TNF<sup>-/-</sup> mice, none of the treatment regimens had any significant effects in reducing weight  
211 loss (Fig. 2E). Mice given oseltamivir or the combined treatment had significantly lower clinical scores than  
212 etanercept- or mock-treated animals (Fig. 2F). Lung viral load and histopathological scores were also  
213 reduced by oseltamivir or combined treatment but not by etanercept- or mock treatment (Fig. 2G and H).  
214 The reduced viral load likely contributed to the lower clinical and histopathological scores in TNF<sup>-/-</sup> mice.

215 TM mice exhibited apparent beneficial effects from the single or combined treatment regimens, similar to  
216 observations made in WT mice (Fig. 2I-L). On day 6 p.i., etanercept treatment reduced weight loss  
217 compared to mock treatment, but the effect was more pronounced in oseltamivir or combined treatment  
218 groups (Fig. 2I). All treatment regimens significantly reduced clinical scores, with the combined treatment  
219 having the most prominent effect (Fig. 2J). Oseltamivir or combined treatment, but not etanercept, reduced  
220 lung viral load (Fig. 2K). Lung histopathological scores were significantly reduced by oseltamivir or  
221 etanercept monotherapy, but the combined treatment reduced it to a substantially greater extent (Fig. 2L).

222 Microscopic examination of lung histological sections revealed dramatic reductions in parenchymal edema  
223 and damage to bronchial and alveolar walls in WT mice given the combined treatment compared to the  
224 other treatment groups (Fig. 3A-H). Focal leukocyte infiltration was most abundant in lungs of WT mice  
225 given mock-treatment compared with oseltamivir- or etanercept-treated groups, but it was only moderate in  
226 mice given the combined therapy (Fig. 3A-H). In TNF<sup>-/-</sup> mice, IAV-induced lung edema and inflammatory  
227 cell recruitment, were reduced by oseltamivir or combined treatment, but not by etanercept (Fig. 3I-P).  
228 However, the extent of improvements was less compared to WT mice. All treatment regimens ameliorated

229 edema and inflammatory cell infiltration in TM mice, except for mock treatment, but the degree of  
230 improvement was highest in the combined-treated group (Fig. 3 Q-X).

231 To obtain an insight into the mechanisms through which treatment with etanercept combined with a higher  
232 dose of oseltamivir, both administered daily (Fig. 2 and 3), we focused on the effects of treatment on  
233 inflammatory cytokine and chemokine mRNA transcript levels using lung tissue samples from the  
234 experiment described in Fig. 2.

235 Compared to mock treatment, etanercept or oseltamivir reduced mRNA transcripts for TNF, IL-1 $\beta$ , and IL-  
236 12p40 (Fig. 4 A, B and C), whereas the combined treatment was more effective in decreasing the levels of  
237 those cytokines as well as IL-6 and the chemokines CCL2, CCL5, and CXCL10 (Fig. 4 D-G). Levels of  
238 mTNF were decreased marginally by etanercept but significantly by oseltamivir or the combined treatment  
239 (Fig. 4H). All treatment regimens reduced levels of activated phosphorylated (p) NF- $\kappa$ B p65 (pNF- $\kappa$ B p65)  
240 protein, but only oseltamivir treatment was significant (Fig. 4I). However, protein levels of pSTAT3 were  
241 reduced only by oseltamivir or the combined treatment but not etanercept (Fig. 4J).

242 Taken together, the effectiveness of the combined treatment regimen in reducing weight loss, clinical  
243 disease, lung pathology and viral load was associated with significant reductions in TNF, IL-1 $\beta$ , IL-6, IL-  
244 12p40, CCL2, CCL5 and CXCL10 and to some extent pSTAT3. It was evident that the higher dose of  
245 oseltamivir resulted in significant reductions in viral load and levels of IL-1 $\beta$  more effectively (Fig. 4)  
246 compared to treatment with a lower dose oseltamivir (Supplementary Fig. S4).

## 247 **Combined Daily Treatment with Etanercept and High Dose Oseltamivir Protects Mice from Lethal** 248 **IAV infection**

249 We determined whether the higher dose of oseltamivir administration in the combined treatment regimen  
250 afforded protection against influenza pneumonia, and lethal disease. IAV-infected mice were treated with  
251 high dose oseltamivir, etanercept or both drugs after the onset of disease signs at day 3 p.i. once daily for  
252 up to 20 days. Animals were monitored for morbidity and mortality until day 21 p.i. when all surviving animals  
253 were killed. TNF<sup>-/-</sup> mice, which do not respond to etanercept treatment (Fig. 2) were infected and treated  
254 similarly for use as controls.

255 Both WT and TNF<sup>-/-</sup> mice infected with IAV continued to lose weight from day 2 p.i. and exhibited clinical  
256 signs of disease from day 3 p.i. (Fig. 5 A-D). All mock-treated WT mice succumbed to infection and were  
257 killed for ethical reasons by day 6 p.i. Etanercept treatment prolonged survival by 1 day in 4 of 5 (80%) IAV-  
258 infected WT mice (Fig. 5E). Oseltamivir treatment alone protected 1 of 5 (20%) mice from lethal IAV infection  
259 while the remaining animals succumbed on days 6 and 7 p.i. Mice given the combined treatment had the  
260 highest survival rate wherein one mouse succumbed to the infection on day 11 p.i. but 80% of animals  
261 survived until day 21 when they were killed (Fig. 5E). Mock-treated TNF<sup>-/-</sup> mice succumbed to the infection  
262 on days 5 or 6 p.i. (Fig. 5F) and there were no beneficial effects of etanercept, oseltamivir or the combined  
263 therapies as all IAV-infected animals succumbed by day 7 p.i.

264 Data presented in the preceding section indicated that viral load in WT mice was significantly reduced by  
265 oseltamivir alone or combined treatment regimens (Fig. 2C). However, a greater proportion of mice in the  
266 combined treatment group survived (Fig. 5E). It was clear that although high dose oseltamivir was effective  
267 in reducing viral load late after the onset of disease signs, it alone was insufficient to protect against influenza  
268 pneumonia, morbidity or mortality. Thus, both virus and inflammation must be targeted simultaneously to  
269 afford protection against influenza pneumonia.

### 270 **STAT3 Inhibitor in Combination with Oseltamivir Reduces Lung Viral Load and Improves Lung** 271 **Pathology and Morbidity Associated with Severe IAV Infection**

272 The STAT3 pathway is downstream of the NF- $\kappa$ B pathway, and dysregulated TNF levels cause  
273 hyperactivation of STAT3, which also correlated with severe pneumonia during respiratory ectromelia virus  
274 (ECTV) infection (26, 27). ECTV causes mousepox, a surrogate mouse model for smallpox caused by the  
275 variola virus in humans (34). Treatment of ECTV-infected mice with a selective STAT3 inhibitor, SI-301,  
276 significantly reduced lung pathology, but it was insufficient to protect the animals (26). However, inhibition  
277 of STAT3 combined with an antiviral drug, cidofovir, significantly reduced clinical disease and viral load and  
278 ameliorated lung pathology (33). The reduced morbidity was associated with reductions in inflammatory  
279 cytokine/chemokine gene/protein expression. We hypothesized that a similar approach of simultaneous  
280 targeting of virus and the STAT3 signaling pathway might also be effective in the IAV pneumonia model.

281 Although the standard dose of oseltamivir (40 mg/kg) was ineffective in reducing viral load when combined  
282 with etanercept (Supplementary Fig. S3D), we first investigated whether it would be effective in reducing  
283 morbidity when combined with S3I-201. Mice infected with IAV were given 20 mg/kg oseltamivir orally twice  
284 daily, 5mg/kg S3I-201 via the i.p. route or a combination of both drugs beginning on day 3 after the onset of  
285 disease signs, and treatment continued on days 4 and 5 p.i. All animals were killed on day 6 p.i.

286 The combined treatment significantly reduced weight loss, clinical scores, and lung histopathological scores  
287 but did not affect lung viral load (Supplementary Fig. S5 A-J). SI-301 had no effect on weight loss or viral  
288 load but reduced the clinical and histopathological scores. Mechanistically, oseltamivir reduced mRNA  
289 levels for IL-1 $\beta$  and IL-12p40 and protein levels of mTNF and pNF- $\kappa$ B (Supplementary Fig. S6 B, D, H and  
290 J). S3I-201 or combined treatment significantly reduced mRNA transcripts for IL-1 $\beta$ , IL-6 and IL-12p40  
291 (Supplementary Fig. S6 B-D). In addition, the combined treatment also significantly reduced TNF and CCL2  
292 mRNA and proteins levels of pNF- $\kappa$ B p65 and pSTAT3 (Supplementary Fig. S6 A, E, I and J). None of the  
293 treatment regimens had any significant impact on CCL5 and CXCL10 mRNA transcript (Supplementary Fig.  
294 S6 F and G).

295 We next investigated whether the combined treatment regimen with S3I-201 and high dose oseltamivir  
296 would be more effective in reducing morbidity. Groups of IAV infected mice were treated with 150 mg/kg  
297 oseltamivir, 5mg/kg S3I-201 or both drugs (combined) on days 3 and 4 p.i. after the onset of disease signs.  
298 Since one of the mock-treated animals was severely moribund, all mice were killed on day 5 p.i. for ethical  
299 reasons.

300 High dose oseltamivir did not affect weight loss and modestly reduced lung histopathological scores but had  
301 a significant impact in reducing clinical scores and lung viral load (Fig. 6 A-D). S3I-201 or combined  
302 treatment significantly reduced weight loss, clinical scores and lung histopathological scores, while the latter  
303 also reduced the lung viral load and was by far the most effective in reducing all parameters measured (Fig.  
304 6 A-D). Compared to other treatment groups, the combined treatment diminished lung inflammation and  
305 damage, evident by reduced edema, cellular infiltration, and bronchial epithelial necrosis (Fig. 6 E-L).

306 High dose oseltamivir, through its effect on lowering lung viral load, significantly reduced the levels of  
307 expression of TNF, IL-1 $\beta$ , IL-12p40 and CCL5 (Fig. 6 *M, N, P* and *R*). The combined treatment effectively  
308 dampened lung inflammation as early as 2 days after the initiation of treatment through reductions in the  
309 mRNA levels of TNF, IL-1 $\beta$ , IL-6, IL-12p40, CCL2, CCL5 and CXCL10 (Fig. 6 *M-S*).

310 Taken together, simultaneous targeting of virus and host inflammatory response by etanercept or STAT3  
311 inhibitor is a viable strategy to treat severe IAV pneumonia, particularly when treatment needs to be initiated  
312 late after the onset of signs and symptoms. Significantly, combined treatment with oseltamivir and either of  
313 the anti-inflammatory drugs dampened an overlapping set of inflammatory factors that included TNF, IL-1 $\beta$ ,  
314 IL-6, IL-12p40, CCL2, CCL5, and CXCL10.

## 315 **Discussion**

316 Pneumonia is a severe complication caused by inflammation of the lungs due to infection with diverse viral  
317 pathogens that often results in respiratory failure and death. Seasonal and pandemic influenza viruses (1-  
318 4), variola virus (agent of smallpox) (35) and severe acute respiratory syndrome coronavirus 2 (SARS-CoV-  
319 2) (36) are leading examples. Pneumonia is one of the most common and life-threatening complications of  
320 IAV infection (2). Globally, nearly 1 billion people are infected with seasonal influenza annually, with 3-5  
321 million cases of severe illness and 300,000-650,000 deaths (37, 38). In 2017 alone, 145,000 deaths and  
322 about 9.5 million hospitalizations were attributed to influenza-associated lower respiratory tract infection,  
323 including pneumonia (39).

324 There are no specific treatments for influenza pneumonia other than hospitalization and supportive care.  
325 Antivirals against IAV are ineffective against severe influenza and pneumonia if treatment is not initiated  
326 within 48 hours of disease symptoms. Most individuals do not seek medical attention within this timeframe  
327 (Choi et al, 2018). There is, therefore, an urgent need to advance therapies that specifically treat severe  
328 IAV post-onset of symptoms. This study reports an efficacious approach to treating influenza pneumonia by  
329 simultaneous treatment with an antiviral and an anti-inflammatory drug.

330 Strategies that target the virus alone with antivirals have shown limited clinical efficacy in treating IAV  
331 infection, especially when treatment is initiated late during the course of illness. Oseltamivir, the most

332 commonly used anti-IAV drug, is only effective in reducing morbidity, hospital admissions or disease  
333 complications when treatment is commenced within 48 h of onset of symptoms (5). The ineffectiveness of  
334 antivirals in ameliorating pneumonia or reducing morbidity late after onset of disease symptoms is not  
335 unique to IAV infection. Several studies, including our own, have shown that cidofovir or tecovirimat (Tpoxx),  
336 antiviral agents that are effective in treating orthopoxvirus (OPXV) infections, are only partially protective if  
337 administered late after disease onset (33, 40-42). Similarly, antiviral drugs for the herpes simplex virus  
338 (acyclovir and valacyclovir) are effective only when administered within 72 h of lesion appearance (43). In  
339 patients hospitalized with SARS-CoV-2 infection, antiviral drugs, including remdesivir, lopinavir, and  
340 interferon were found to have little or no effect in reducing disease progression and mortality (44).

341 On the other hand, although strategies to limit or dampen inflammation during IAV infection have shown  
342 potential benefits, evidence on clinical benefits from the use of only anti-inflammatory drugs is inconclusive,  
343 particularly in hospitalized patients or when the treatment initiation is delayed (14). Corticosteroids, widely  
344 used as anti-inflammatory agents, were ineffective in preventing mortality of IAV H5N1 infected mice when  
345 treatment was initiated late after the onset of disease signs (45, 46). Other important regulators of  
346 inflammation, including peroxisome proliferator-activated receptor agonist and cyclooxygenase inhibitors,  
347 showed no survival benefits in H5N1 IAV infected mice when administered 48 h p.i. (47). In contrast,  
348 immunomodulatory agents targeting sphingosine-1-phosphate receptor agonist (48), C-C chemokine  
349 receptor 2 (49), or AMP-activated protein kinase (50) protected mice against lethal influenza virus challenge.  
350 These agents were administered as prophylactics or very early after virus inoculation. Such treatment  
351 regimens have a minimal translatory application, especially since patients often seek medical advice after  
352 the onset of symptoms or once they have developed pneumonia.

353 Both high viral load and high levels of inflammatory factors (cytokines, chemokines and transcription factors)  
354 increase the risk of illness severity and mortality after the onset of disease signs in H1N1 or H5N1 IAV  
355 infections in mice and humans (Fig. S1)(1, 9, 51, 52). That provided a rationale for the simultaneous  
356 targeting of virus replication and host inflammatory response as an approach to reduce morbidity and  
357 mortality in IAV infected mice. We co-administered oseltamivir and anti-inflammatory drugs (etanercept or

358 SI-301) to reduce lung viral load and pathology and improve survival rates in mice with H1N1 influenza  
359 pneumonia.

360 We first focused on TNF, which is produced in the early phases of IAV infection and is associated with  
361 illness severity and morbidity in mice (53), swine (54) and human (55) influenza. Anti-TNF drugs are used  
362 widely to treat immune-mediated inflammatory diseases, including rheumatoid arthritis, Crohn's disease,  
363 and psoriatic arthritis (56). However, in contrast to treating chronic inflammatory diseases, our results show  
364 that the effective treatment of IAV pneumonia would require multiple doses of etanercept. We have also  
365 made a similar finding in a mouse model of OPXV pneumonia (33), indicating that the levels of TNF  
366 produced in the lung during acute respiratory viral infection might be different from those produced during  
367 chronic inflammatory disease and as a result, requires multiple doses of etanercept.

368 Combined treatment with etanercept and oseltamivir, late after the onset of disease signs, reduced  
369 morbidity, viral load, and lung pathology in IAV-infected mice through downregulation of inflammatory  
370 factors. These included TNF, IL-1 $\beta$ , IL-6, IL-12p40, CCL2, CCL5 and CXCL10. It also reduced the activation  
371 of STAT3. Etanercept or oseltamivir monotherapy had limited clinical benefits given that they reduced the  
372 mRNA levels of some inflammatory factors but not to the extent of the combined treatment regimen. In a  
373 previous study, Shi and colleagues reported that etanercept treatment 2 h p.i. with H1N1 IAV protected mice  
374 from otherwise lethal infection (57). Our study evaluated the efficacy of combined therapy in a realistic  
375 timeframe that closely reflects timeframes when patients present at hospitals. Even before it has developed,  
376 treating lung inflammation in humans (even before it has developed) from the day of infection is neither  
377 feasible nor practical. However, if exposure to virulent or pandemic strains of IAV is identified very early,  
378 then anti-IAV drugs, at a standard recommended dose of 75 mg twice daily, would effectively minimize the  
379 risk of severe disease, morbidity and mortality (22). We found that a higher dose of oseltamivir at 150  
380 mg/kg/day, but not a standard mouse dose of 40 mg/kg/day (58) effectively reduced the lung IAV load. A  
381 higher dose of oseltamivir should be considered for evaluation in a clinical setting, particularly in the milieu  
382 of severe lung inflammation when the treatment initiation might be delayed.

383 We made a similar finding when the STAT3 signaling pathway was targeted instead of the TNF/NF- $\kappa$ B  
384 pathway to reduce lung inflammation. Combined treatment with S3I-201 and oseltamivir reduced viral load,



385 disease signs and lung pathology in IAV-infected mice through the downregulation of the same set of  
386 cytokines and chemokines as combined treatment with etanercept and oseltamivir, i.e., TNF, IL-1 $\beta$ , IL-6, IL-  
387 12p40, CCL2, CCL5 and CXCL10. These cytokines and chemokines enhance acute phase signaling, recruit  
388 inflammatory cells, including neutrophils, monocytes, and T lymphocytes to the site of infection, and trigger  
389 secondary cytokine production, resulting in lung inflammation and pathology (7). Thus, blockading  
390 cytokine(s) or cytokine signaling pathways combined with antiviral treatment will be expected to reduce  
391 leukocyte recruitment into the lung. Indeed, the combined treatment using either etanercept or SI-301  
392 significantly reduced leukocyte migration to the lungs as evident histologically. In ECTV-infected mice,  
393 combined treatment with etanercept and cidofovir reduced recruitment of inflammatory monocytes to the  
394 lung (33). Inflammatory monocytes produce cytokines like IL-1, TNF, IL-6, CCL2 and CXCL10.

395 Various stimuli, including viral infection and inflammatory cytokines, activate the NF- $\kappa$ B and STAT3 signaling  
396 pathways. TNF and IL-1 activate NF- $\kappa$ B (59), which enhances cytokine expression, including IL-6, which is  
397 a potent inducer of STAT3 activation (13, 60, 61). NF- $\kappa$ B and STAT3 cooperatively regulate the expression  
398 of several inflammatory cytokines, such as IL-6, CCL2, CCL5, IL-8, and IL-17 (62, 63). A recent study  
399 evaluating global chromatin binding has revealed more than 36,000 *cis*-regulatory regions that can  
400 potentially bind to both STAT3 and NF- $\kappa$ B (64). NF- $\kappa$ B and STAT3 can collaboratively induce their target  
401 gene expression through direct physiological interaction or cooperative binding at a subset of gene  
402 promoters/enhancers (62, 64, 65).

403 Our results are in agreement with several other studies that have evaluated the therapeutic potential of  
404 adjunctive anti-inflammatory drug interventions in severe respiratory diseases. Corticosteroids in  
405 combination with antiviral agents effectively alleviate the 2009 pandemic H1N1 influenza-associated  
406 pneumonia (66). Similarly, Zheng *et al.* reported on the benefit of adjunctive therapy in an experimental  
407 mouse study where treatment was initiated late at 48 h after H5N1 IAV inoculation (47). They demonstrated  
408 amelioration of lung pathology and improved survival rates in virus-infected mice coadministration with  
409 cyclooxygenase inhibitors (mesalamine and celecoxib) and zanamivir. Besides IAV pneumonia, respiratory  
410 OPXV (26) and SARS-CoV-2 pneumonia (67, 68) are also associated with high viral load and dysregulated  
411 inflammation and may benefit from combined antiviral and anti-inflammatory treatment approaches. We

412 have recently shown therapeutic efficacy of combined cidofovir (a viral DNA polymerase inhibitor) and  
413 etanercept or STAT3 inhibitor treatment in ameliorating lung pathology and protecting mice from lethal  
414 OPXV pneumonia (33). Similarly, Kalil et al. demonstrated superior effects of combination treatment with  
415 baricitinib, a Janus kinase inhibitor, and remdesivir, RNA-dependent RNA polymerase inhibitor, over  
416 remdesivir monotherapy in improving the clinical status of hospitalized COVID-19 patients (69).

417 Excessive early inflammatory cytokine/chemokine responses and leukocyte recruitment can predict poor  
418 prognosis and poor clinical outcomes in IAV infections (1, 9, 10). Many inflammatory factors are responsible  
419 for leukocyte recruitment into the lungs (8, 11, 12). Our results indicated that targeting just one inflammatory  
420 cytokine (TNF) or a cytokine signaling pathway (STAT3) is sufficient to ameliorate lung pathology, reduce  
421 leukocyte infiltration, and confer protection from an otherwise lethal disease when treated combined with  
422 oseltamivir. An important finding in this study is that either etanercept or SI-301 treatment combined with  
423 oseltamivir dampened the same set of inflammatory cytokines/chemokines, i.e., TNF, IL-1 $\beta$ , IL-6, IL-12p40,  
424 CCL2, CCL5, and CXCL10. We believe that STAT3 inhibition will be more appropriate in individuals who  
425 cannot be treated with etanercept due to contraindications to the drug or when TNF may not be the driver  
426 of lung inflammation. Indeed, in a model of respiratory OPVX infection in TNF<sup>-/-</sup> mice, combined treatment  
427 with cidofovir and SI-301 effectively reduced viral load and lung pathology (33).

428 In summary, combined treatment targeting virus and TNF/NF- $\kappa$ B or STAT3 pathways reduces viral load,  
429 clinical illness, and lung pathology in IAV infected mice through downregulation of inflammatory cytokines  
430 and chemokines, many of which are implicated in disease severity and lung pathology caused by other  
431 respiratory viruses, including OPXV (33) and coronaviruses (70). Therefore, the focus of clinical  
432 management of patients with severe viral pneumonia, associated with high viral load and dysregulated  
433 inflammation, should be on effective control of both viral replication and inflammatory cytokine and  
434 chemokine responses by the combined antiviral and anti-inflammatory drug treatment approach. More  
435 patient-oriented clinical research should be undertaken to test this treatment approach in severe respiratory  
436 diseases, in particular those caused by viruses of pandemic potential, which includes IAV and SARS-CoV-  
437 2. In the latter case, treatment efficacy would significantly increase when antivirals specific to the SARS-  
438 CoV-2 are available.

439 **Materials and Methods**

440 **Animal Ethics Statement**

441 Animal experiments were performed in accordance with protocols approved by the Animal Ethics Committee  
442 of the University of Tasmania (UTAS) (Protocol number A0016372) and the Animal Ethics and  
443 Experimentation Committee of the Australian National University (ANU) (Protocol numbers A2011/011 and  
444 A2014/018).

445 **Mice**

446 C57BL/6J wild-type (WT) female mice, bred under specific pathogen-free conditions, were obtained from  
447 the Australian Phenomics Facility (APF), ANU, Canberra, the Cambridge Farm Facility, UTAS, Tasmania  
448 or the Animal Resource Centre, Western Australia, Australia. In addition to WT mice, TNF deficient (TNF<sup>-/-</sup>)  
449 (71) and triple mutant (TM or mTNF<sup>ΔΔ</sup>.TNFRI<sup>-/-</sup>.II<sup>-/-</sup>, expressing only mTNF but lacking sTNF and TNFRs)  
450 (27) mice, bred at the APF, ANU were used in this study. One week prior to start of experiments, mice were  
451 transferred to the virus suite and allowed to acclimatize. Mice were used at 6-12 weeks of age.

452 **Cell Lines and Viruses**

453 Madin-Darby Canine Kidney (MDCK) cells (ATTC No. CCL-34) were cultured in Dulbecco's Modified Eagle  
454 Medium (DMEM) supplemented with 2mM L-glutamine (Sigma-Aldrich), antibiotics (1x PSN; 50 U/mL  
455 penicillin, 50 µg/mL streptomycin, and 100 µg/mL neomycin) (Sigma-Aldrich), and 10 % heat inactivated  
456 fetal bovine serum (FBS). This will be referred to as cell growth medium. Cell cultures were maintained at  
457 37°C in a 5% CO<sub>2</sub> atmosphere.

458 Stocks of Influenza A virus (IAV) H1N1 (A/PR/8/34) strain were propagated in 10-day old, specific-pathogen-  
459 free embryonated chicken eggs, and viral titers were determined in MDCK cells using plaque assay or  
460 median tissue culture infectious dose (TCID<sub>50</sub>) assay described elsewhere (72).

461

## 462 **Virus Infection, Animal Weights, and Clinical Scores**

463 Age-matched mice were anesthetized with an isoflurane (UTAS) at 5% for induction and 2% for  
464 maintenance intranasally (i.n.) using the Stinger Streamline Rodent/Exotics Anesthetic Gas Machine  
465 (Advanced Anesthesia Specialists) or with tribromoethanol (ANU) at 160-240 mg/kg through the  
466 intraperitoneal (i.p.) route. Mice were infected with 3000 plaque forming unit (PFU) of IAV, housed in  
467 individually ventilated cages under biological safety level 2 containment facilities and monitored daily;  
468 weighed and scored for clinical signs of illness (scores ranged from 0 to 3 for each of the five clinical  
469 parameters, condition of hair coat, posture, breathing, lacrimation and nasal discharge, and activity and  
470 behavior) as described elsewhere (26, 27). For ethical reasons and as required by the animal ethics  
471 protocols, mice that were severely moribund with a clinical score of  $\geq 10$  and/or a body weight loss of  $\geq 20\%$   
472 (UTAS) or 25% (ANU) were killed by CO<sub>2</sub> asphyxiation, lung tissues collected for subsequent analyses and  
473 animals considered dead the following day.

## 474 **Drug Treatments**

475 Different groups of mice were administered with 100  $\mu$ l of oseltamivir (Tamiflu; Roche) diluted in phosphate  
476 buffered saline (PBS) via oral gavage (o.g.) at 150 mg/kg (once daily) or 20 mg/kg (twice daily), etanercept  
477 (Enbrel; Pfizer Inc.) i.p. at 2.5 mg/kg diluted in PBS or S3I-201 (STAT3 inhibitor VI, Sigma-Aldrich, cat. no.  
478 573102) (i.p.) at 5 mg/kg after the onset of disease signs. S3I-201 was first dissolved in DMSO at 200  
479 mg/mL and then further diluted in PBS to a working stock solution of 1 mg/mL.

## 480 **Plaque Assay for Virus Quantification**

481 Viral titers were determined as virus plaque forming units (PFU) per gram of lung tissue samples using a  
482 plaque assay as described elsewhere (72). Briefly, homogenized lung samples were serially diluted (10-  
483 fold) and inoculated into the confluent MDCK monolayer in a 6-well tissue culture plate. After 1 h incubation,  
484 inoculum was removed and the monolayer was covered with the agar overlay. After 4 days of incubation,  
485 the agar overlay was removed and the cells were fixed with 10% formalin followed by staining with 0.1%  
486 crystal violet. Viral titers were calculated as PFU/g. For details, see Supplementary Information, Materials  
487 and Methods.

## 488 **TCID<sub>50</sub> Assay for Virus Quantification**

489 TCID<sub>50</sub> assay for IAV quantification was previously described elsewhere (72). Briefly, serial dilutions of lung  
490 homogenates were inoculated into the MDCK cell monolayer in a 96-well tissue culture plate. After 1 h of  
491 virus adsorption, inoculum was removed and the infected monolayer was incubated in the virus growth  
492 medium at 37 °C, 5% CO<sub>2</sub> for 4 days. The cells were then fixed with 10% formalin and stained with 0.1%  
493 crystal violet to visualize virus induced cell cytopathic effect (CPE). We calculated the viral titer as TCID<sub>50</sub>/g  
494 using the Reed-Muench method (73). For details, see Supplementary Information, Materials and Methods.

## 495 **Lung Histopathological Examination**

496 Lung tissue was sectioned and stained with Hematoxylin and eosin (H&E) and assessed for histopathology  
497 using a semi-quantitative scoring system as described elsewhere (26, 27). For more details, see  
498 Supplementary Information, Materials and Methods.

## 499 **RNA Extraction, cDNA Generation and quantitative reverse transcription polymerase chain reaction** 500 **(qRT-PCR)**

501 RNA was extracted from the lung tissue homogenized in TRIzol solution (ThermoFisher Scientific, cat. no.  
502 15596026) as described elsewhere (26, 27), and cDNA was synthesized using RevertAid first strand cDNA  
503 synthesis kit (ThermoFisher Scientific, cat. no. K1622). PowerUp SYBR Green Master Mix (ThermoFisher  
504 Scientific, cat. no. A25742) was used to measure mRNA transcripts of cytokines/chemokines levels using  
505 quantitative real-time PCR (qRT-PCR). Recorded cycle threshold values were normalized to the  
506 housekeeping gene Ubiquitin C (UBC). Details on the procedure and primers used are presented in  
507 Supplementary Information, Materials and Methods.

## 508 **Protein Extraction and Western Blot Analysis**

509 Total protein extraction from the lung tissue and western blot analysis was undertaken as described  
510 elsewhere (26). Details on the procedure and antibodies used are included in Supplementary Information,  
511 Materials and Methods.

512 **Statistical Analysis**

513 Statistical analyses of experimental data, as indicated in the legend to each figure, were performed using  
514 appropriate tests to compare results using GraphPad Prism 9 (GraphPad Software, Inc.). A value of  $P <$   
515  $0.05$  was taken to be significant: \*,  $p < 0.05$ ; \*\*,  $p < 0.01$ ; \*\*\*,  $p < 0.001$  and \*\*\*\*,  $p < 0.0001$ .

516 **Acknowledgments**

517 This work was supported by grants from the National Health and Medical Research Council of Australia  
518 (Grant 1007980) and the Medical Protection Society of Tasmania Inc., Tasmania, Australia. The funders  
519 had no role in study design, data collection and interpretation, or the decision to submit the work for  
520 publication. We gratefully acknowledge Professor Jane Dahlstrom, Canberra Hospital for helping us develop  
521 the lung histopathology scoring system. We are grateful to the UTAS Animal Services Division and the ANU  
522 Phenomics Facility for the care and breeding of mice. P.P. was the recipient of a Tasmanian School of  
523 Medicine Research Scholarship through the University of Tasmania.

524

## 525 **References**

- 526 1. M. D. de Jong *et al.*, Fatal outcome of human influenza A (H5N1) is associated with high viral load  
527 and hypercytokinemia. *Nat Med* **12**, 1203-1207 (2006).
- 528 2. J. Rello, A. Pop-Vicas, Clinical review: primary influenza viral pneumonia. *Critical care (London,*  
529 *England)* **13**, 235 (2009).
- 530 3. J. Rello *et al.*, Intensive care adult patients with severe respiratory failure caused by Influenza A  
531 (H1N1)v in Spain. *Critical care (London, England)* **13**, R148 (2009).
- 532 4. M. B. Rothberg, S. D. Haessler, R. B. Brown, Complications of viral influenza. *The American journal*  
533 *of medicine* **121**, 258-264 (2008).
- 534 5. T. Jefferson *et al.*, Neuraminidase inhibitors for preventing and treating influenza in healthy adults  
535 and children. *The Cochrane database of systematic reviews* **2014**, Cd008965 (2014).
- 536 6. S. H. Choi *et al.*, Late diagnosis of influenza in adult patients during a seasonal outbreak. *Korean J*  
537 *Intern Med* **33**, 391-396 (2018).
- 538 7. J. R. Tisoncik *et al.*, Into the eye of the cytokine storm. *Microbiology and Molecular Biology Reviews*  
539 **76**, 16-32 (2012).
- 540 8. N. L. La Gruta, K. Kedzierska, J. Stambas, P. C. Doherty, A question of self-preservation:  
541 immunopathology in influenza virus infection. *Immunology and cell biology* **85**, 85-92 (2007).
- 542 9. D. Kobasa *et al.*, Aberrant innate immune response in lethal infection of macaques with the 1918  
543 influenza virus. *Nature* **445**, 319-323 (2007).
- 544 10. C. M. Oshansky *et al.*, Mucosal Immune Responses Predict Clinical Outcomes during Influenza  
545 Infection Independently of Age and Viral Load. *American Journal of Respiratory and Critical Care*  
546 *Medicine* **189**, 449-462 (2014).
- 547 11. T. J. Schall, K. B. Bacon, Chemokines, leukocyte trafficking, and inflammation. *Current opinion in*  
548 *immunology* **6**, 865-873 (1994).
- 549 12. R. Alon *et al.*, Leukocyte trafficking to the lungs and beyond: lessons from influenza for COVID-19.  
550 *Nature reviews. Immunology* **21**, 49-64 (2021).
- 551 13. P. Pandey, G. Karupiah, Targeting tumour necrosis factor to ameliorate viral pneumonia. *The FEBS*  
552 *journal* (2021).
- 553 14. Q. Liu, Y. H. Zhou, Z. Q. Yang, The cytokine storm of severe influenza and development of  
554 immunomodulatory therapy. *Cellular & molecular immunology* **13**, 3-10 (2016).
- 555 15. R. L. Peper, H. Van Campen, Tumor necrosis factor as a mediator of inflammation in influenza A  
556 viral pneumonia. *Microbial pathogenesis* **19**, 175-183 (1995).
- 557 16. S. E. Belisle *et al.*, Genomic profiling of tumor necrosis factor alpha (TNF-alpha) receptor and  
558 interleukin-1 receptor knockout mice reveals a link between TNF-alpha signaling and increased  
559 severity of 1918 pandemic influenza virus infection. *Journal of virology* **84**, 12576-12588 (2010).

- 560 17. F. G. Hayden *et al.*, Local and systemic cytokine responses during experimental human influenza  
561 A virus infection. Relation to symptom formation and host defense. *The Journal of clinical*  
562 *investigation* **101**, 643-649 (1998).
- 563 18. B. R. B. Pires, R. Silva, G. M. Ferreira, E. Abdelhay, NF-kappaB: Two Sides of the Same Coin. *Genes*  
564 **9** (2018).
- 565 19. M. S. Hayden, S. Ghosh, Regulation of NF-κB by TNF family cytokines. *Semin Immunol* **26**, 253-266  
566 (2014).
- 567 20. A. D. Watts *et al.*, A casein kinase I motif present in the cytoplasmic domain of members of the  
568 tumour necrosis factor ligand family is implicated in 'reverse signalling'. *The EMBO journal* **18**,  
569 2119-2126 (1999).
- 570 21. G. Eissner, W. Kolch, P. Scheurich, Ligands working as receptors: reverse signaling by members of  
571 the TNF superfamily enhance the plasticity of the immune system. *Cytokine & growth factor*  
572 *reviews* **15**, 353-366 (2004).
- 573 22. DTB, Oseltamivir for influenza. *Drug and therapeutics bulletin* **40**, 89-91 (2002).
- 574 23. CDC (2021) Influenza Antiviral Medications: Summary for Clinicians. (Centers for Disease and  
575 Prevention).
- 576 24. E. De Clercq, Antiviral agents active against influenza A viruses. *Nature reviews. Drug discovery* **5**,  
577 1015-1025 (2006).
- 578 25. S. Ramiro *et al.*, Combination therapy for pain management in inflammatory arthritis (rheumatoid  
579 arthritis, ankylosing spondylitis, psoriatic arthritis, other spondyloarthritis). *The Cochrane*  
580 *database of systematic reviews* 10.1002/14651858.CD008886.pub2, Cd008886 (2011).
- 581 26. M. J. Tuazon Kels *et al.*, TNF deficiency dysregulates inflammatory cytokine production, leading to  
582 lung pathology and death during respiratory poxvirus infection. *Proceedings of the National*  
583 *Academy of Sciences of the United States of America* **117**, 15935-15946 (2020).
- 584 27. Z. Al Rumaih *et al.*, Poxvirus-encoded TNF receptor homolog dampens inflammation and protects  
585 from uncontrolled lung pathology during respiratory infection. *Proceedings of the National*  
586 *Academy of Sciences* **117**, 26885-26894 (2020).
- 587 28. Z. Kaymakcalan *et al.*, Comparisons of affinities, avidities, and complement activation of  
588 adalimumab, infliximab, and etanercept in binding to soluble and membrane tumor necrosis  
589 factor. *Clinical immunology (Orlando, Fla.)* **131**, 308-316 (2009).
- 590 29. U. Meusch, M. Rossol, C. Baerwald, S. Hauschildt, U. Wagner, Outside-to-inside signaling through  
591 transmembrane tumor necrosis factor reverses pathologic interleukin-1beta production and  
592 deficient apoptosis of rheumatoid arthritis monocytes. *Arthritis and rheumatism* **60**, 2612-2621  
593 (2009).
- 594 30. D. Damjanovic *et al.*, Negative regulation of lung inflammation and immunopathology by TNF-α  
595 during acute influenza infection. *The American journal of pathology* **179**, 2963-2976 (2011).
- 596 31. R. Dutkowski *et al.*, Safety and pharmacology of oseltamivir in clinical use. *Drug safety* **26**, 787-801  
597 (2003).



- 598 32. P. Ward, I. Small, J. Smith, P. Suter, R. Dutkowski, Oseltamivir (Tamiflu) and its potential for use in  
599 the event of an influenza pandemic. *The Journal of antimicrobial chemotherapy* **55 Suppl 1**, i5-i21  
600 (2005).
- 601 33. P. Pandey *et al.*, Targeting ectromelia virus and TNF/NF- $\kappa$ B or STAT3 signaling for effective  
602 treatment of viral pneumonia. *Proceedings of the National Academy of Sciences of the United*  
603 *States of America In Press* (2022).
- 604 34. G. Karupiah, V. Panchanathan, I. G. Sakala, G. Chaudhri, Genetic resistance to smallpox: lessons  
605 from mousepox. *Novartis Foundation symposium* **281**, 129-136; discussion 136-140, 208-129  
606 (2007).
- 607 35. P. J. Ross, A. Seaton, H. M. Foreman, W. H. Morris Evans, Pulmonary calcification following  
608 smallpox handler's lung. *Thorax* **29**, 659-665 (1974).
- 609 36. P. Zhou *et al.*, A pneumonia outbreak associated with a new coronavirus of probable bat origin.  
610 *Nature* **579**, 270-273 (2020).
- 611 37. A. D. Iuliano *et al.*, Estimates of global seasonal influenza-associated respiratory mortality: a  
612 modelling study. *Lancet (London, England)* **391**, 1285-1300 (2018).
- 613 38. O. World Health, *Global influenza strategy 2019-2030* (World Health Organization, Geneva, 2019).
- 614 39. G. I. Collaborators, Mortality, morbidity, and hospitalisations due to influenza lower respiratory  
615 tract infections, 2017: an analysis for the Global Burden of Disease Study 2017. *The Lancet.*  
616 *Respiratory medicine* **7**, 69-89 (2019).
- 617 40. D. C. Quenelle, D. J. Collins, E. R. Kern, Efficacy of multiple- or single-dose cidofovir against vaccinia  
618 and cowpox virus infections in mice. *Antimicrob Agents Chemother* **47**, 3275-3280 (2003).
- 619 41. M. Bray *et al.*, Cidofovir protects mice against lethal aerosol or intranasal cowpox virus challenge.  
620 *The Journal of infectious diseases* **181**, 10-19 (2000).
- 621 42. A. T. Russo *et al.*, Effects of Treatment Delay on Efficacy of Tecovirimat Following Lethal Aerosol  
622 Monkeypox Virus Challenge in Cynomolgus Macaques. *The Journal of infectious diseases* **218**,  
623 1490-1499 (2018).
- 624 43. C. Cernik, K. Gallina, R. T. Brodell, The Treatment of Herpes Simplex Infections: An Evidence-Based  
625 Review. *Archives of Internal Medicine* **168**, 1137-1144 (2008).
- 626 44. W. S. T. Consortium, Repurposed Antiviral Drugs for Covid-19 — Interim WHO Solidarity Trial  
627 Results. *New England Journal of Medicine* **384**, 497-511 (2020).
- 628 45. T. Xu *et al.*, Effect of dexamethasone on acute respiratory distress syndrome induced by the H5N1  
629 virus in mice. *The European respiratory journal* **33**, 852-860 (2009).
- 630 46. R. Salomon, E. Hoffmann, R. G. Webster, Inhibition of the cytokine response does not protect  
631 against lethal H5N1 influenza infection. *Proceedings of the National Academy of Sciences of the*  
632 *United States of America* **104**, 12479-12481 (2007).
- 633 47. B.-J. Zheng *et al.*, Delayed antiviral plus immunomodulator treatment still reduces mortality in  
634 mice infected by high inoculum of influenza A/H5N1 virus. *Proceedings of the National Academy*  
635 *of Sciences* **105**, 8091-8096 (2008).

- 636 48. K. B. Walsh *et al.*, Suppression of cytokine storm with a sphingosine analog provides protection  
637 against pathogenic influenza virus. *Proceedings of the National Academy of Sciences of the United*  
638 *States of America* **108**, 12018-12023 (2011).
- 639 49. K. L. Lin, S. Sweeney, B. D. Kang, E. Ramsburg, M. D. Gunn, CCR2-antagonist prophylaxis reduces  
640 pulmonary immune pathology and markedly improves survival during influenza infection. *Journal*  
641 *of immunology (Baltimore, Md. : 1950)* **186**, 508-515 (2011).
- 642 50. C. E. Moseley, R. G. Webster, J. R. Aldridge, Peroxisome proliferator-activated receptor and AMP-  
643 activated protein kinase agonists protect against lethal influenza virus challenge in mice. *Influenza*  
644 *and other respiratory viruses* **4**, 307-311 (2010).
- 645 51. A. C. Boon *et al.*, H5N1 influenza virus pathogenesis in genetically diverse mice is mediated at the  
646 level of viral load. *mBio* **2** (2011).
- 647 52. K. K. To *et al.*, Delayed clearance of viral load and marked cytokine activation in severe cases of  
648 pandemic H1N1 2009 influenza virus infection. *Clinical infectious diseases : an official publication*  
649 *of the Infectious Diseases Society of America* **50**, 850-859 (2010).
- 650 53. T. Hussell, A. Pennycook, P. J. Openshaw, Inhibition of tumor necrosis factor reduces the severity  
651 of virus-specific lung immunopathology. *European journal of immunology* **31**, 2566-2573 (2001).
- 652 54. K. Van Reeth, S. Van Gucht, M. Pensaert, Correlations between lung proinflammatory cytokine  
653 levels, virus replication, and disease after swine influenza virus challenge of vaccination-immune  
654 pigs. *Viral Immunol* **15**, 583-594 (2002).
- 655 55. R. S. Fritz *et al.*, Nasal cytokine and chemokine responses in experimental influenza A virus  
656 infection: results of a placebo-controlled trial of intravenous zanamivir treatment. *The Journal of*  
657 *infectious diseases* **180**, 586-593 (1999).
- 658 56. L. C. Silva, L. C. Ortigosa, G. Benard, Anti-TNF- $\alpha$  agents in the treatment of immune-mediated  
659 inflammatory diseases: mechanisms of action and pitfalls. *Immunotherapy* **2**, 817-833 (2010).
- 660 57. X. Shi *et al.*, Inhibition of the inflammatory cytokine tumor necrosis factor-alpha with etanercept  
661 provides protection against lethal H1N1 influenza infection in mice. *Critical care (London, England)*  
662 **17**, R301 (2013).
- 663 58. D. F. Smee, M. H. Wong, K. W. Bailey, R. W. Sidwell, Activities of oseltamivir and ribavirin used  
664 alone and in combination against infections in mice with recent isolates of influenza A (H1N1) and  
665 B viruses. *Antiviral chemistry & chemotherapy* **17**, 185-192 (2006).
- 666 59. T. Lawrence, The nuclear factor NF-kappaB pathway in inflammation. *Cold Spring Harbor*  
667 *perspectives in biology* **1**, a001651 (2009).
- 668 60. J. G. Bode, U. Albrecht, D. Häussinger, P. C. Heinrich, F. Schaper, Hepatic acute phase proteins--  
669 regulation by IL-6- and IL-1-type cytokines involving STAT3 and its crosstalk with NF-kB-dependent  
670 signaling. *European journal of cell biology* **91**, 496-505 (2012).
- 671 61. A. Oeckinghaus, M. S. Hayden, S. Ghosh, Crosstalk in NF-kB signaling pathways. *Nat Immunol* **12**,  
672 695-708 (2011).
- 673 62. J. Yang *et al.*, Unphosphorylated STAT3 accumulates in response to IL-6 and activates transcription  
674 by binding to NFkappaB. *Genes & development* **21**, 1396-1408 (2007).

- 675 63. S. I. Grivennikov, M. Karin, Dangerous liaisons: STAT3 and NF-kappaB collaboration and crosstalk  
676 in cancer. *Cytokine Growth Factor Rev* **21**, 11-19 (2010).
- 677 64. Z. Ji, L. He, A. Regev, K. Struhl, Inflammatory regulatory network mediated by the joint action of  
678 NF-kB, STAT3, and AP-1 factors is involved in many human cancers. *Proceedings of the National  
679 Academy of Sciences* **116**, 9453-9462 (2019).
- 680 65. H. Lee *et al.*, Persistently activated Stat3 maintains constitutive NF-kappaB activity in tumors.  
681 *Cancer Cell* **15**, 283-293 (2009).
- 682 66. K. Kudo *et al.*, Systemic corticosteroids and early administration of antiviral agents for pneumonia  
683 with acute wheezing due to influenza A(H1N1)pdm09 in Japan. *PLoS one* **7**, e32280 (2012).
- 684 67. J. Fajnzylber *et al.*, SARS-CoV-2 viral load is associated with increased disease severity and  
685 mortality. *Nature communications* **11**, 5493 (2020).
- 686 68. C. Huang *et al.*, Clinical features of patients infected with 2019 novel coronavirus in Wuhan, China.  
687 *The Lancet* **395**, 497-506 (2020).
- 688 69. A. C. Kalil *et al.*, Baricitinib plus Remdesivir for Hospitalized Adults with Covid-19. *New England  
689 Journal of Medicine* **384**, 795-807 (2020).
- 690 70. V. A. Ryabkova, L. P. Churilov, Y. Shoenfeld, Influenza infection, SARS, MERS and COVID-19:  
691 Cytokine storm – The common denominator and the lessons to be learned. *Clinical Immunology  
692* **223**, 108652 (2021).
- 693 71. H. Körner *et al.*, Distinct roles for lymphotoxin- $\alpha$  and tumor necrosis factor in organogenesis and  
694 spatial organization of lymphoid tissue. *European journal of immunology* **27**, 2600-2609 (1997).
- 695 72. A. L. Balish, J. M. Katz, A. I. Klimov, Influenza: propagation, quantification, and storage. *Current  
696 protocols in microbiology* **29**, 15G. 11.11-15G. 11.24 (2013).
- 697 73. L. J. Reed, H. Muench, A simple method of estimating fifty percent endpoints. *American Journal of  
698 Epidemiology* **27**, 493-497 (1938).
- 699

700 **Figures and table**

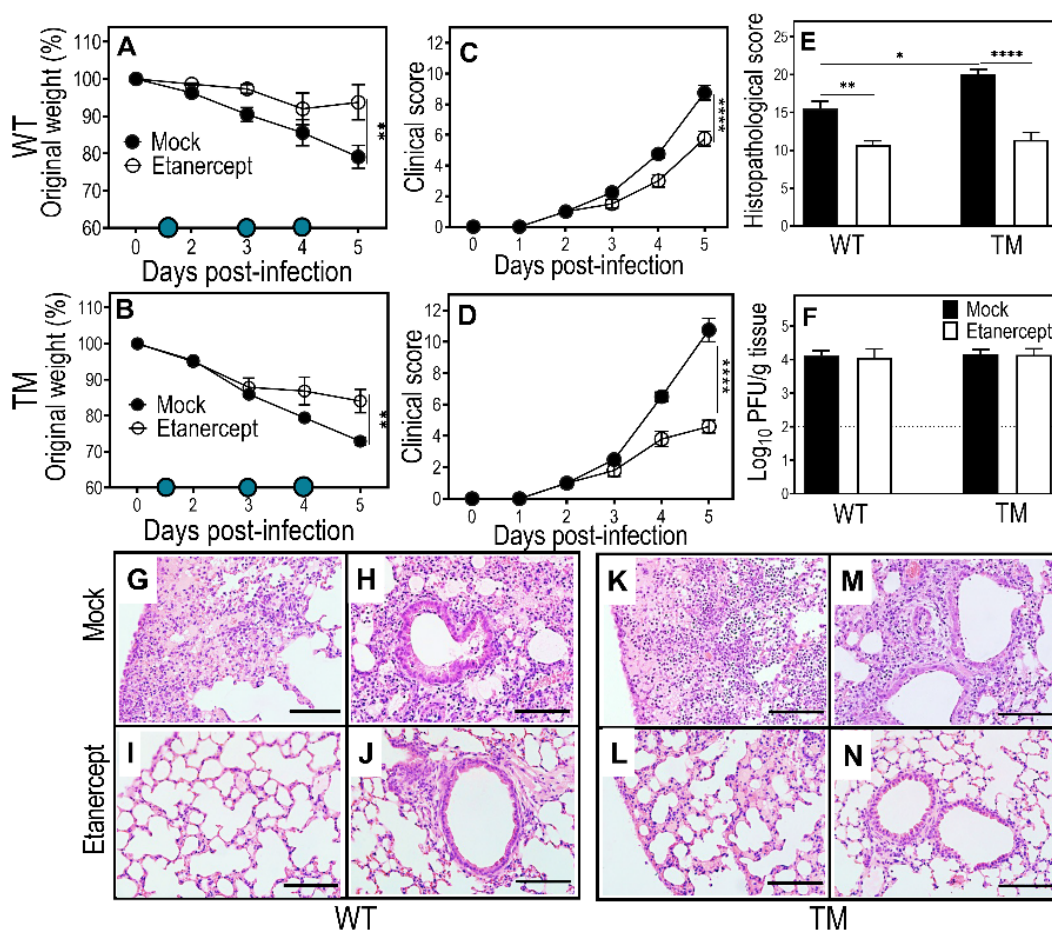

701

702 **Fig. 1. Etanercept treatment reduces weight loss, clinical scores and lung pathology but not viral**  
 703 **load in IAV-infected WT and TM mice.** Age-matched groups of female WT and TM mice (n = 4 or 5) were  
 704 infected with 3000 PFU IAV i.n. Animals were treated with 2.5 mg/kg etanercept or diluent (mock) on days  
 705 1, 3 and 4 p.i. as indicated in panels A and B where filled blue circle symbols indicate etanercept treatment  
 706 days. Animals were killed on day 5 p.i. and lungs collected for analyses. Weight loss (A and B) and clinical  
 707 scores (C and D) were analyzed using two-way ANOVA with Sidak's post-tests and expressed as means ±  
 708 SEM. Viral load data (E) were log-transformed, analyzed using ordinary one-way ANOVA test with Fisher's  
 709 least significant difference (LSD) tests and expressed as means ± SEM. Histopathological scores (F), based  
 710 on microscopic examination of lung histology H&E sections (G), were examined using bright field

711 microscope on all fields at 400x magnification. Histopathological scores were analyzed by ordinary one-way  
712 ANOVA test with Tukey's post-tests and expressed as means  $\pm$  SEM. Lung histology sections (G-N) show  
713 reductions in edema, leukocyte infiltration, and damage to alveolar septa in lungs of IAV-infected WT and  
714 TM mice by etanercept treatment. \*,  $p < 0.05$ ; \*\*,  $p < 0.01$  and \*\*\*,  $p < 0.001$ . Broken line in panel E  
715 corresponds to the limit of virus detection. Bars in panel G-N correspond to 100  $\mu\text{m}$ . TM, triple mutant mice  
716 that express mTNF but not sTNF, TNFRI or TNFRII; WT, wild-type mice. Data shown are from a single  
717 experiment.

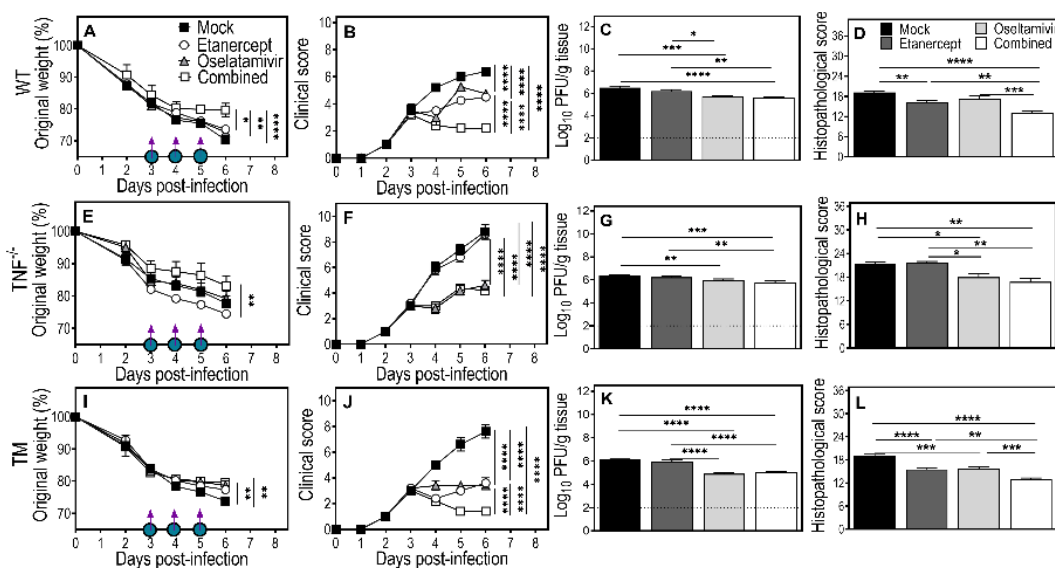

718

719 **Fig. 2. Combined treatment with etanercept and oseltamivir reduces clinical scores, lung viral load**

720 **and pathology in IAV-infected WT, TNF<sup>-/-</sup> and TM mice.** Age-matched groups of WT, TNF<sup>-/-</sup> and TM (n =

721 4 or 5) female mice were infected with 3000 PFU IAV i.n., treated with oseltamivir (150 mg/kg), etanercept

722 (2.5 mg/kg) or a combination (combined) on days 3, 4 and 5 p.i., as indicated in panels A, E and I where a

723 purple arrow and a filled blue circle symbols indicate oseltamivir and etanercept treatment days,

724 respectively. Animals were monitored for weight loss (A, E and I) and clinical scores (B, F and J) until day

725 6 p.i., when all animals were killed and lung tissue collected for various analyses. Data were analyzed by

726 two-way ANOVA with Sidak's post-tests and expressed as means ± SEM. Viral load (C, G and K) data was

727 log-transformed, analyzed using ordinary one-way ANOVA test followed by Fisher's LSD tests and

728 expressed as means ± SEM. Histopathological scores (D, H and L) were derived from microscopic

729 examination of lung histology H&E sections (presented in Fig. 3), analyzed using ordinary one-way ANOVA

730 test followed by Tukey's multiple comparisons tests and expressed as means ± SEM. \*, p < 0.05; \*\*, p <

731 0.01; \*\*\*, p < 0.001 and \*\*\*\*, p < 0.0001. Broken lines in panels C, G and K correspond to the limit of virus

732 detection. Data shown are from a single experiment.

733

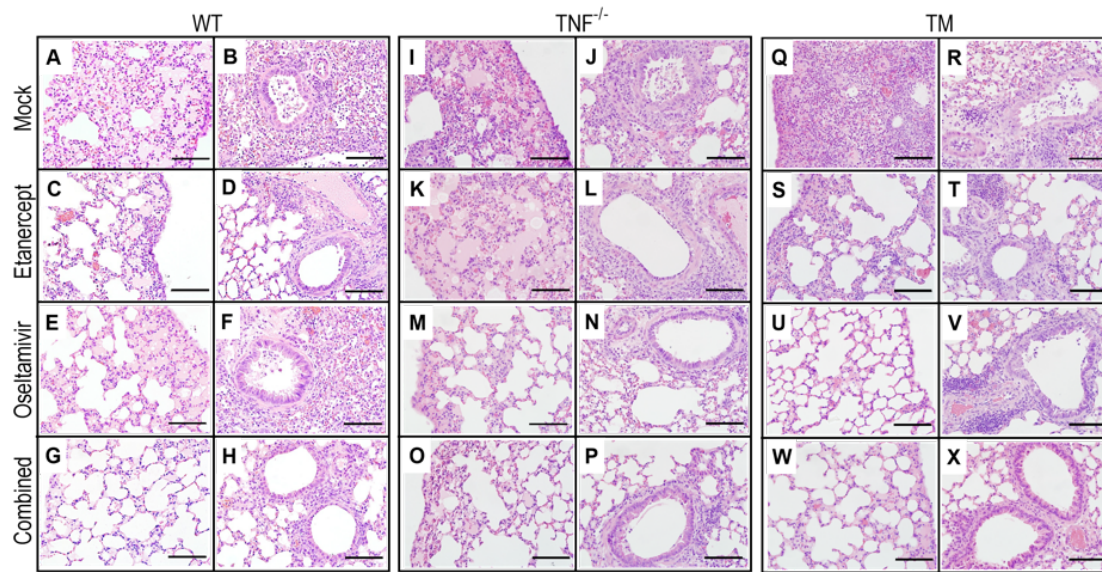

734

735 **Fig. 3. Combined daily treatment with etanercept and high dose oseltamivir reduces IAV-infection**

736 **induced lung pathology to a greater extent in WT and TM mice than TNF<sup>-/-</sup> mice.** Lung tissue sections

737 were obtained from mice that were infected and treated as described in Fig. 2. Briefly, groups of WT, TNF<sup>-/-</sup>

738 <sup>-/-</sup> and TM mice (n = 4 or 5) were infected with 3000 PFU IAV i.n. and then treated with oseltamivir or

739 etanercept or both drugs combined on days 3, 4 and 5 p.i. Animals were killed on day 6 p.i., lungs were

740 collected, fixed in 10% neutral buffered formalin, processed, embedded in paraffin blocks, sectioned, stained

741 with H&E and examined using bright field microscope on all fields at 400x magnification. Bars in panels A-

742 X correspond to 100  $\mu$ m. Data shown are from a single experiment.

743

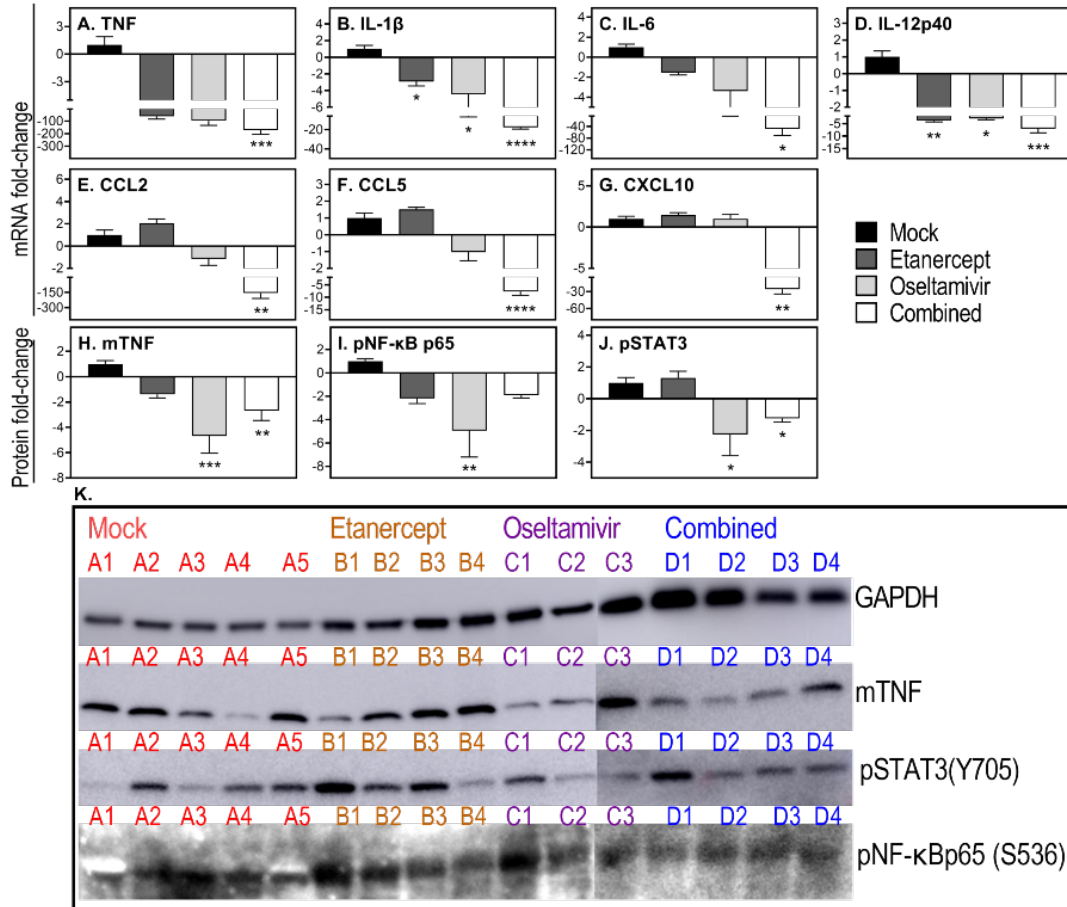

744

745 **Fig. 4. Combined daily treatment with etanercept and high dose oseltamivir reduces expression of**  
 746 **inflammatory cytokines and chemokines and activation of STAT3.** Lung tissues were obtained from  
 747 WT mice that were infected and treated as described in Fig. 2. Briefly, WT (n = 4 or 5) mice were infected  
 748 with 3000 PFU IAV i.n. and treated with oseltamivir (150 mg/kg) or etanercept or combined treatment on  
 749 days 3, 4, and 5 p.i. Animals were killed on day 6 p.i. and lungs collected for quantifying levels of expression  
 750 of selected cytokines and chemokines using qPCR (A-G). Protein levels of mTNF (H), pNF-κB p65 (I), and  
 751 pSTAT3 (J) were detected by western blotting (K) and quantified with the ImageJ software. For (K), samples  
 752 were run on 2 separate gels, i.e., gel 1, A1-C2; gel 2, C3-D4. Data were analyzed by one-way ANOVA with  
 753 Holm-Sidak's multiple comparisons tests and expressed as mean fold-change relative to the mock treated  
 754 group ± SEM. \*, p < 0.05; \*\*, p < 0.01; \*\*\*, p < 0.001 and \*\*\*\*, p < 0.0001. Data shown are from a single  
 755 experiment.



756

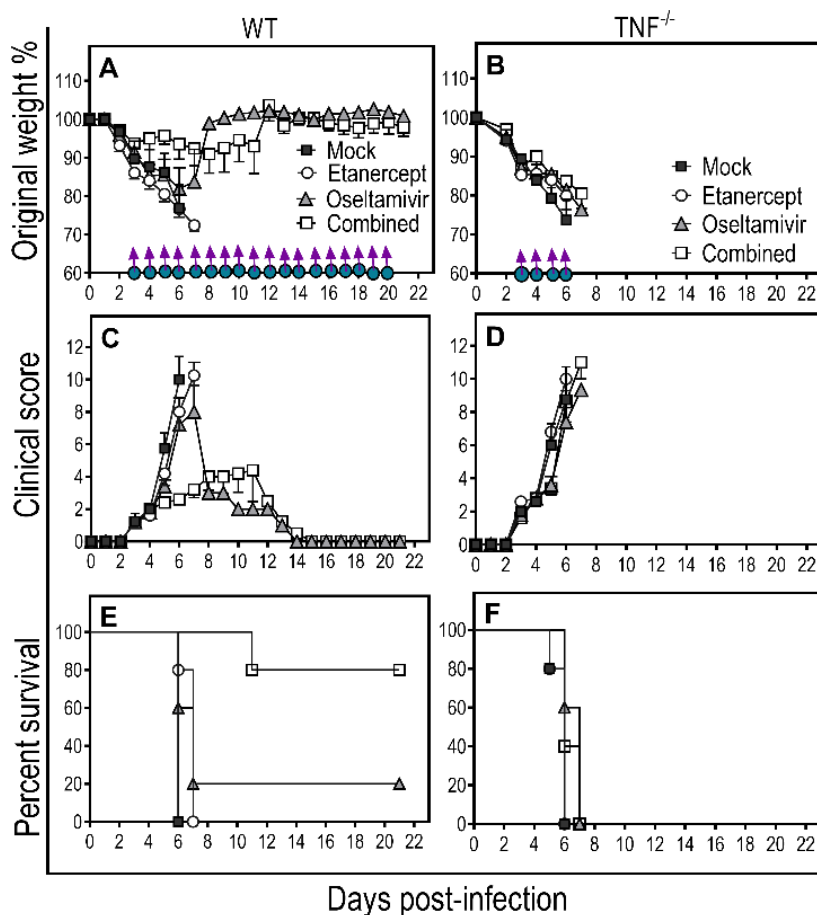

757

758 **Fig. 5. Combined daily treatment with etanercept and high dose oseltamivir reduces weight loss,**  
759 **and clinical scores and improves survival rate of WT but not TNF<sup>-/-</sup> mice infected with IAV.** Age-  
760 matched groups of WT and TNF<sup>-/-</sup> (n = 4 or 5) mice were infected with 3000 PFU IAV i.n. Animals were  
761 treated with oseltamivir or etanercept or both drugs (combined) from day 3 p.i. and treatment continued until  
762 day 20 p.i., as indicated in panels A and B, where a purple arrow and a filled blue circle symbols indicate  
763 oseltamivir and etanercept treatment days, respectively. Animals were monitored daily for weight loss (A  
764 and B), clinical scores (C and D) and survival (E and F). All mock treated WT mice died by day 6 p.i. whereas  
765 etanercept treated animals succumbed between days 6-7 (E). Four of 5 oseltamivir treated WT mice  
766 succumbed between days 6-7 p.i. whereas 1 animal was alive at day 21 p.i. The combined treatment  
767 resulted in 80% of WT mice surviving at day 21 (E). The median survival time for mice treated with

768 etanercept or oseltamivir was 7 days, compared with a median survival of 6 days for mock-treated mice  
769 (log-rank test, mock vs etanercept  $p = 0.0237$ ; mock vs oseltamivir,  $p = 0.0736$ ). Survival for combined  
770 treated animals was greater than 50% (i.e., 80%) at the last time point (day 21 p.i.), hence the median  
771 survival time was >21 days (log-rank test,  $p = 0.0047$  relative to mock-treated mice). Combined treatment  
772 significantly increased median survival compared to etanercept ( $p = 0.0035$ ) or oseltamivir ( $p = 0.0358$ )  
773 treatments. Mock-treated TNF<sup>-/-</sup> mice succumbed to infection on days 5-6 p.i. (F) and there were no  
774 beneficial effects of the different treatment regimens as all IAV-infected mice succumbed by day 7 p.i.  
775 Weight loss (A and B) and clinical scores (C and D) data were analyzed using two-way ANOVA with Sidak's  
776 post-tests and expressed as means  $\pm$  SEM. Survival data (E) were analyzed by Log-rank (Mantel-Cox) test.  
777 Data shown are from a single experiment.

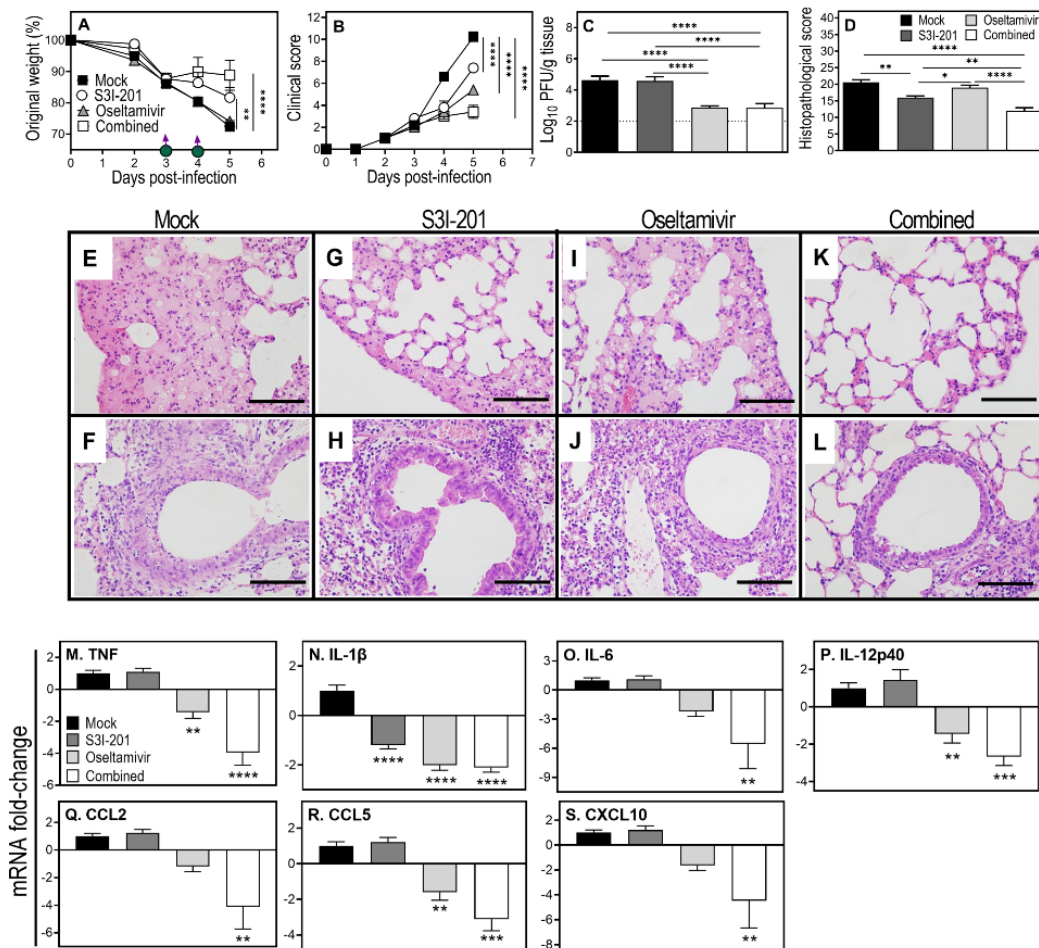

778

779 **Fig. 6. Combined treatment with high dose oseltamivir and S3I-201 reduces clinical scores, lung**

780 **viral load, pathology and downregulates mRNA transcripts for pro-inflammatory cytokines and**

781 **chemokines in IAV-infected mice.** Age-matched groups (n = 5) of female WT mice were infected i.n. with

782 3000 PFU IAV and treated with S3I-201 (5 mg/kg), oseltamivir (150 mg/kg), or both drugs (combined) on

783 days 3 and 4 p.i., as indicated in panel A, where a purple arrow and a filled green circle symbols indicate

784 oseltamivir and S3I-201 treatment days, respectively. For ethical reasons, animals were killed on day 5 p.i.

785 and lung tissue collected for various analyses. Weight loss (A) and clinical scores (B) were monitored until

786 day 5 p.i. Viral load (C) data was log-transformed and analyzed using ordinary one-way ANOVA with

787 Fisher's LSD post-tests. Histopathological scores (D) were derived from microscopic examination of the

788 lung histology H&E sections using bright field microscope on all fields at 400x magnification, presented in

789 panel E-L. Data are expressed as means  $\pm$  SEM and were analyzed using two-way ANOVA (A and B) with  
790 Tukey's multiple comparisons tests (A) and Dunnett's multiple comparisons tests (B) or ordinary one-way  
791 ANOVA followed by Tukey's multiple comparisons tests (D). mRNA transcript analysis was performed in  
792 the separate experiment using the similar treatment strategy as described above. Gene expression levels  
793 of the indicated cytokines and chemokines were quantified using qPCR (M-S). Data are expressed as mean  
794 fold-change relative to the mock treated group  $\pm$  SEM and were analyzed using one-way ANOVA with Holm-  
795 Sidak's multiple comparisons tests. \*,  $p < 0.05$ ; \*\*,  $p < 0.01$ ; \*\*\*,  $p < 0.001$  and \*\*\*\*,  $p < 0.0001$ . Broken line  
796 in panel C corresponds to the limit of virus detection. Bars in panels E-L correspond to 100  $\mu\text{m}$ . Data shown  
797 are from a single experiment.

798 **Table 1.** Correlation coefficient between disease severity determinants and lung viral load or levels of pro-  
799 inflammatory mediators in IAV-infected mice.

| Disease severity determinants | Viral load | Cytokines and chemokines |      |          |      |      |        |
|-------------------------------|------------|--------------------------|------|----------|------|------|--------|
|                               |            | TNF                      | IL-6 | IL-12p40 | CCL2 | CCL5 | CXCL10 |
| Weight loss                   | 0.84       | 0.79                     | 0.72 | 0.62     | 0.57 | 0.68 | 0.72   |
| Clinical score                | 0.82       | 0.74                     | 0.72 | 0.57     | 0.52 | 0.68 | 0.74   |

800  
801 Age-matched groups of WT mice (n = 5) were infected with 1000, 2000, or 3000 PFU IAV i.n. Weight loss  
802 and clinical scores were assessed until day 12 p.i., when all the animals were killed. Lungs were collected  
803 for measuring viral load and mRNA transcripts for pro-inflammatory cytokines and chemokines. Data shown  
804 in Fig. S1 is presented here as Pearson correlation coefficient (r) between any of the two determinants of  
805 disease severity, namely correlation between weight loss and lung viral load or mRNA levels of pro-  
806 inflammatory mediators, and correlation between clinical scores and lung viral load or mRNA levels of pro-  
807 inflammatory mediators.
